# Supplementary material for: Mutation signature analysis identifies increased mutation caused by tobacco smoke associated DNA adducts in larynx squamous cell carcinoma compared with oral cavity and oropharynx
Source: PubMed Central journal article supplement (PMC6917707; doi:10.1038/s41598-019-55352-y), 2019-12-17

## **Supplementary Information**

**Mutation signature analysis identifies increased mutation caused by tobacco smoke associated DNA adducts in larynx squamous cell carcinoma compared with oral cavity and oropharynx.**

Andrew P. South, Nicoline Y. den Breems, Tony Richa, Uche Nwagu, Tingting Zhan, Shiv Poojan, Ubaldo Martinez-Outschoorn, Jennifer M. Johnson, Adam J. Luginbuhl, Joseph M. Curry.

**Figure S1:** COSMIC signature 4 contributes to a greater proportion of mutation burden in larynx compared with minor anatomical sub-sites of HNSCC. **A:** Pie charts show the proportion of mutations attributed to each of the six COSMIC mutation signatures identified in minor anatomical sub-sites of head and neck SCC. **B:** Box and whisker graphs show single nucleotide mutations attributed to signature 1, signature 2, signature 13, and signature 18, identified in each of the major subtypes of HNSCC.  $\bar{x}$  = mean.

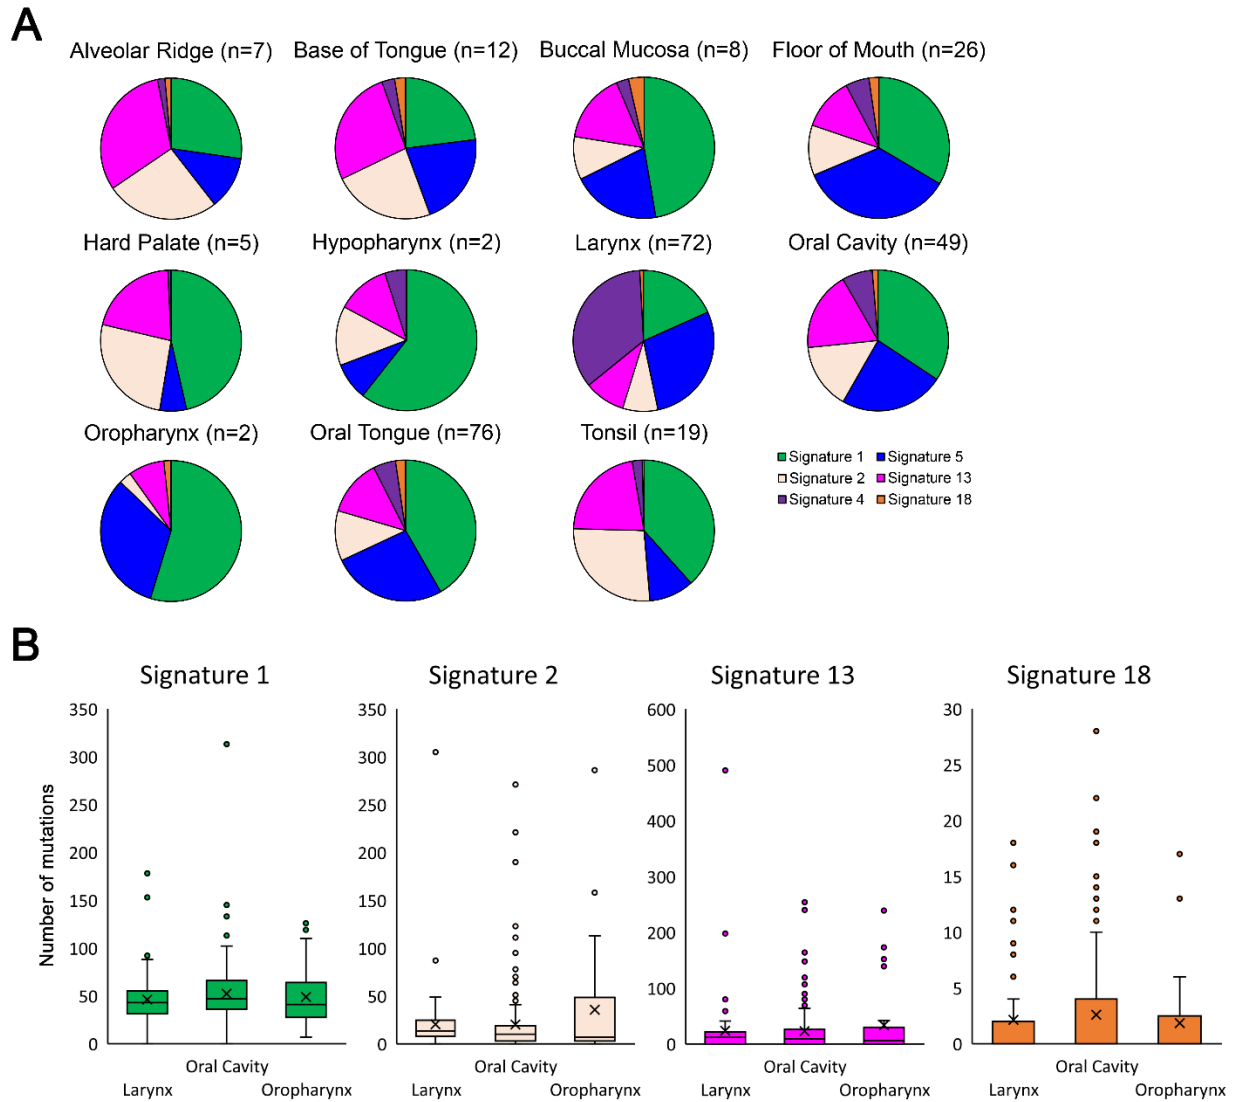

**Figure S2: COSMIC signature 4 or total mutation burden is not influenced by HPV status in oral cavity and oropharynx SCC.** **A:** Box and whisker graphs show total number of single nucleotide mutations as well as those attributed to COSMIC signature 4 and signature 5, identified in HNSCC stratified by presence or absence of HPV. **B:** Box and whisker graphs show total number of single nucleotide mutations as well as those attributed to signature 4 and signature 5, identified in oral cavity and oropharynx HNSCC stratified by presence (n=34) or absence (n=170) of HPV. **C:** Box and whisker graphs show total number of single nucleotide mutations as well as those attributed to signature 4 and signature 5, identified in oropharynx HNSCC stratified by presence or absence of HPV (HPV positive oropharynx n=22, HPV negative oropharynx n=11). x = mean. \* = p < 0.05, \*\* = p < 0.01, \*\*\* = p < 0.001.

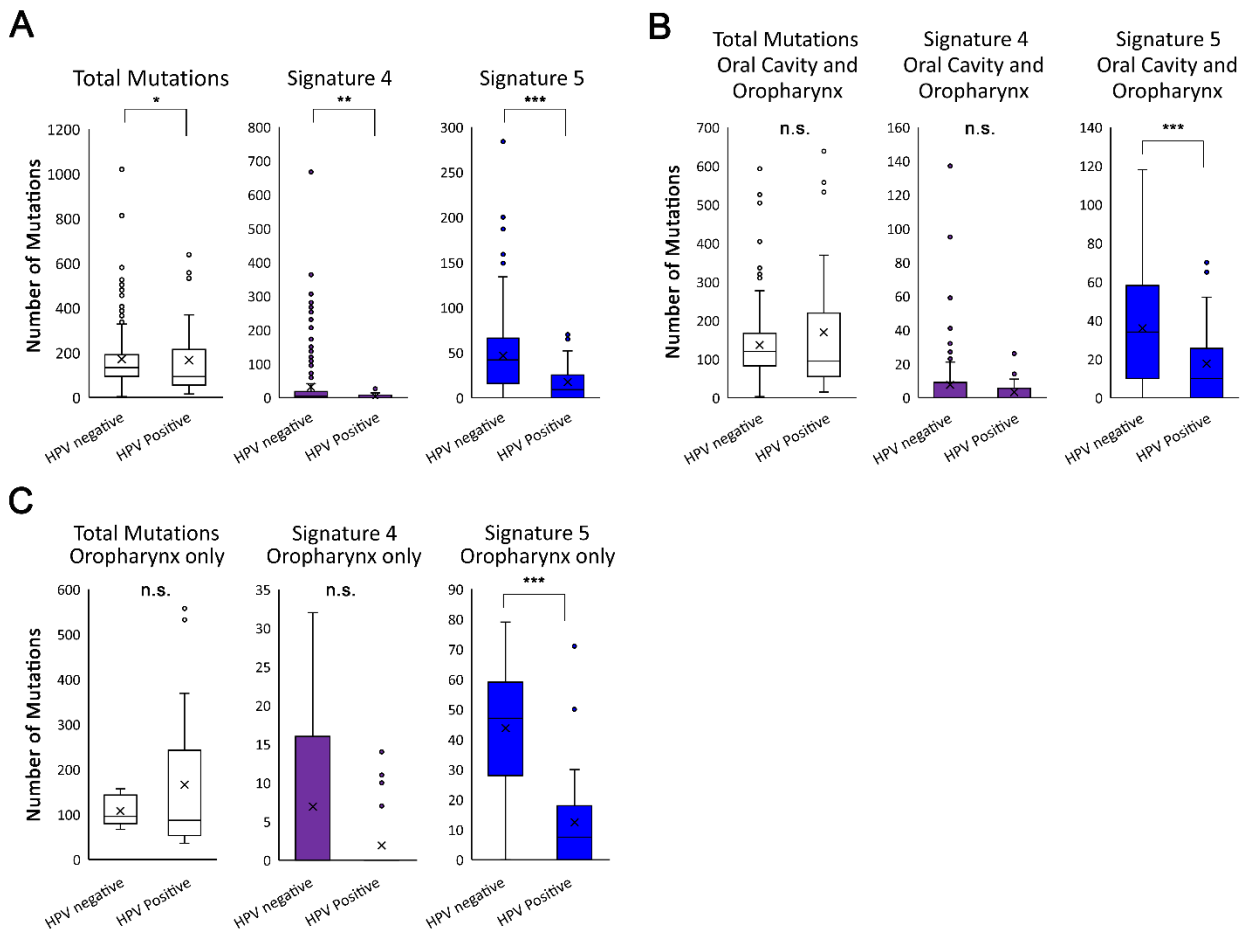

**Figure S3: COSMIC signature analysis of 278 TCGA HNSCC using deconstructSigs**

**A:** Overall mutation numbers assigned to COSMIC Signature 1, 2, 4, 5, 13, and 18, for 278 TCGA HNSCC stratified by major anatomical sub-site (larynx n=72, oral cavity n=171, oropharynx n=33, hypopharynx n=2) and ordered by mutation number (y-axis). **B:** Normalized signature contributions (signature weight, y-axis) for each tumor shown in **A**.

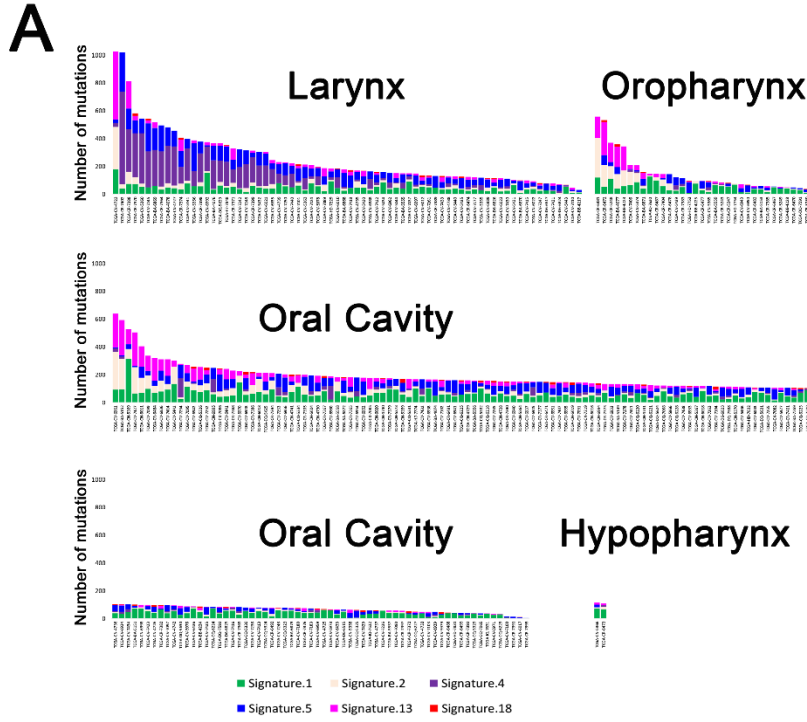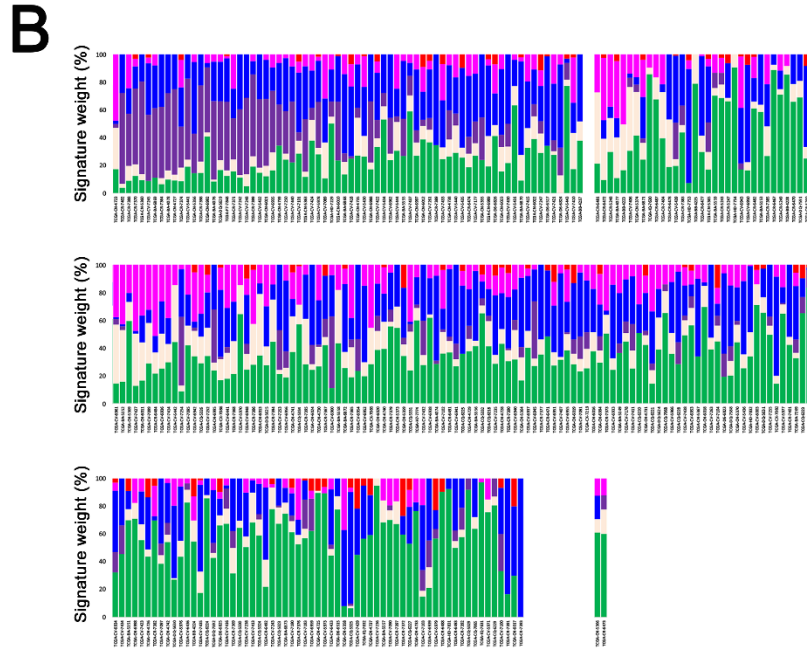

**Figure S4:** Signature 1 mutations shows positive correlation with age in all HNSCC. Graphs shows the number of signature 1 mutations (y-axis, top graph) or signature 5 mutations (y-axis, bottom graph) as determined by deconstructSigs and plotted against the age (x-axis) for all 278 TCGA HNSCC from non-sun exposed sites. These data are in line with previously published observations using the WTSI framework for mutation signature assignment<sup>23</sup>. Pearson Correlation  $r$  and  $p$  values given.

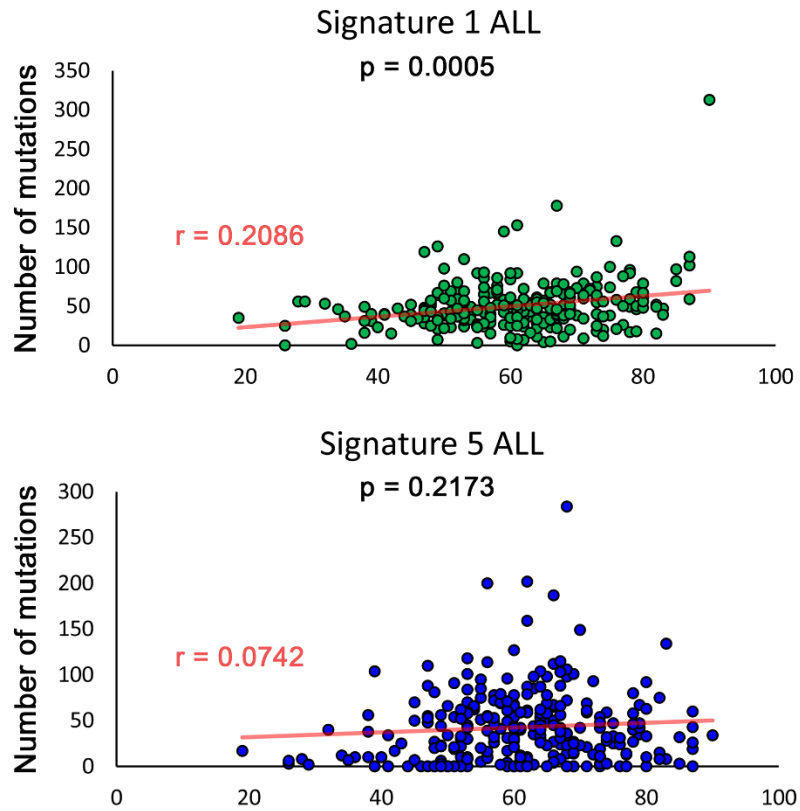



**Figure S6:** **A:** Pie charts show percentage of signature assignment using either the Wellcome Trust Sanger Institute (WTSI) framework or deconstructSigs for all 279 TCGA HNSCC samples. **B:** Comparison of deconstructSig (x-axis) with WTSI signature weights. **C:** Box and whisker graphs show total number of single nucleotide mutations attributed to COSMIC mutation signatures using WTSI framework for each of the major sub-site of HNSCC. **D:** Total mutations stratified by the presence (positive) or absence (negative) of signature 4 mutations identified by the WTSI framework. x = mean. \*\* =  $p < 0.01$ , \*\*\* =  $p < 0.001$ .

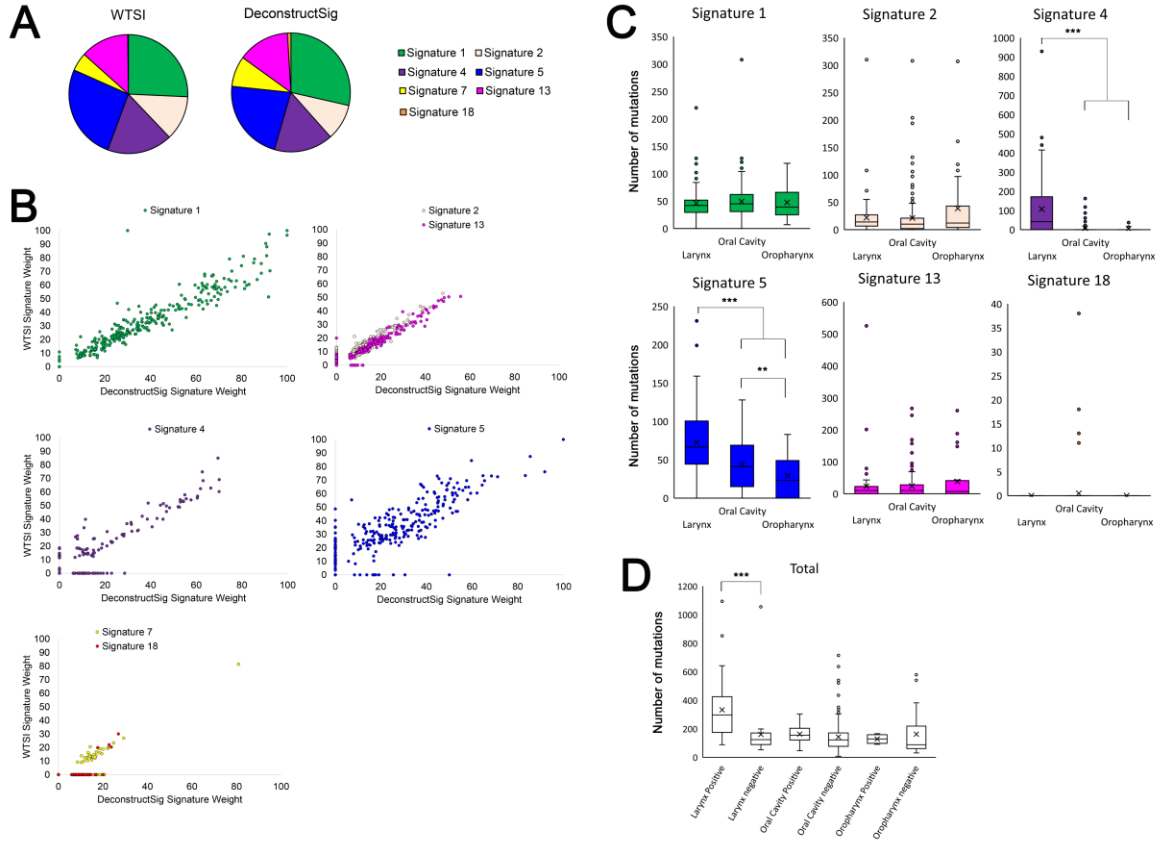

Supplement: 41598_2019_55352_MOESM2_ESM.pdf [file 41598_2019_55352_MOESM2_ESM.pdf]
